# Supplementary material for: Cytokinin Signaling in Mycobacterium tuberculosis
Source: PubMed Central journal article supplement (PMC6016246; doi:10.1128/mbio.00989-18), 2018-06-19
Supplement: mbo003183940sf1.pdf [file mbo003183940sf1.pdf]

|                              |   |      |     |   |      |     |   |    |     |
|------------------------------|---|------|-----|---|------|-----|---|----|-----|
| iP ( $\mu\text{M}$ ):        |   |      |     |   |      |     | 5 | 50 | 500 |
| MgCl <sub>2</sub> :          |   |      |     | + | +    | +   | + | +  | +   |
| Rv0078<br>( $\mu\text{M}$ ): | 0 | 0.01 | 0.1 | 1 | 0.01 | 0.1 | 1 | 1  | 1   |

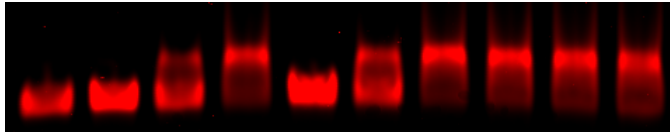

**Fig. S1 . The cytokinin iP cannot dissociate Rv0078 from DNA.** 6% TBE gel was imaged using a LI-COR Odyssey imager. 10 mM MgCl<sub>2</sub> improved DNA binding.
