# Supplementary material for: Cytokinin Signaling in Mycobacterium tuberculosis
Source: PubMed Central journal article supplement (PMC6016246; doi:10.1128/mbio.00989-18), 2018-06-19
Supplement: mbo003183940sf3.pdf [file mbo003183940sf3.pdf]

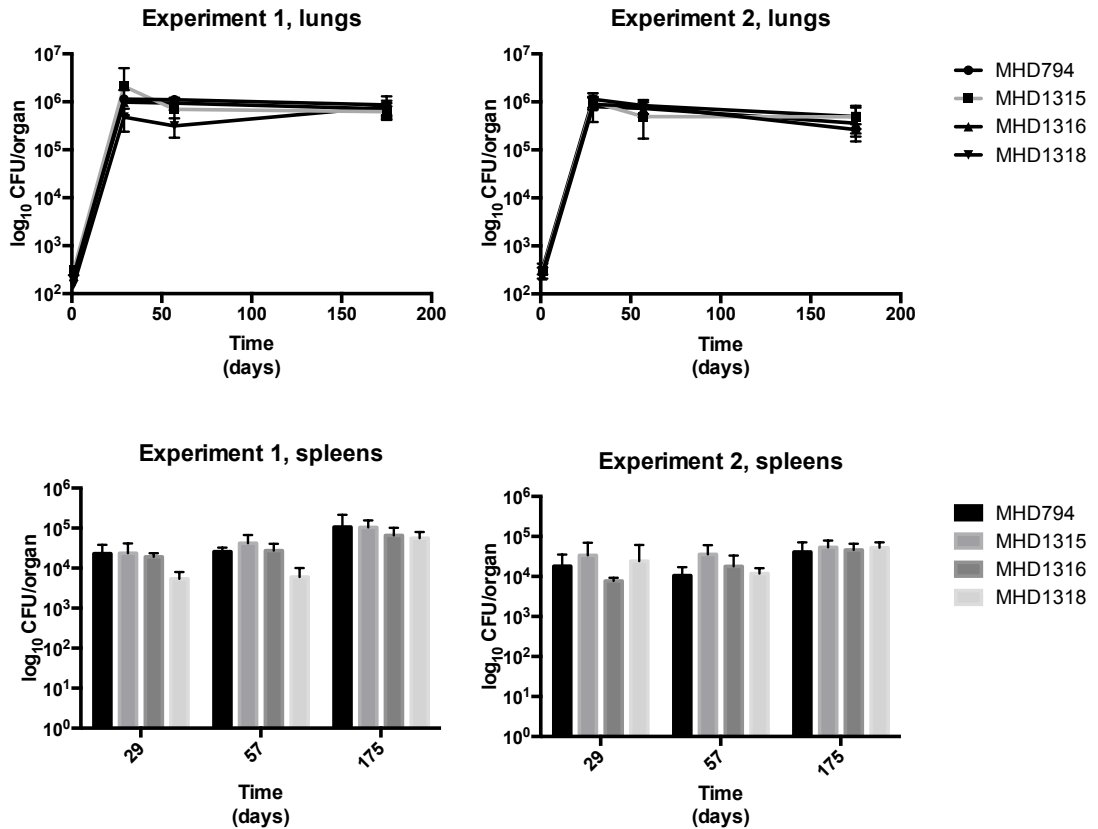

**Fig. S3: An *Rv0078* deletion-disruption mutant, which overexpresses *Rv0077c*, has no long term virulence defect in C57BL6/J mice.** For each experiment, 16 mice were infected with 200-400 colony forming units (CFU) of each strain (64 mice/experiment) by the aerosol route of infection. See Methods for details. MHD794 = WT with empty vector; MHD1315 =  $\Delta Rv0078::hyg$  with empty vector; MHD1316 =  $\Delta Rv0078::hyg$  with *Rv0078W100R*; MHD1318 =  $\Delta Rv0078::hyg$  complemented with WT *Rv0078*. Error bars indicate the standard error of the mean.
