# Supplementary material for: Cytokinin Signaling in Mycobacterium tuberculosis
Source: PubMed Central journal article supplement (PMC6016246; doi:10.1128/mbio.00989-18), 2018-06-19
Supplement: mbo003183940sf4.pdf [file mbo003183940sf4.pdf]

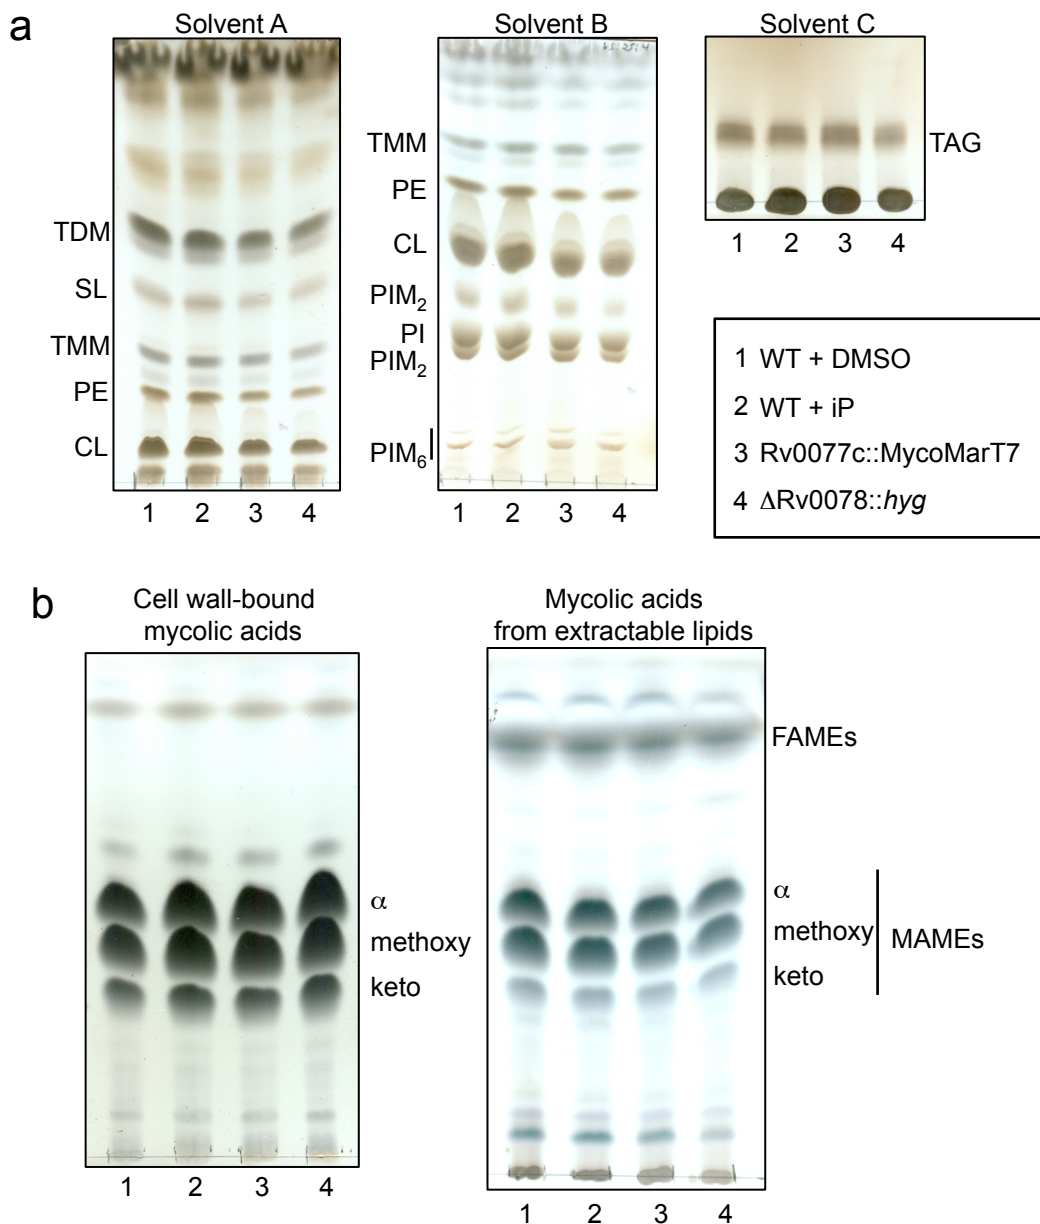

**Fig. S4: Thin-layer chromatography (TLC) analysis of lipids and mycolic acids.** **a**, Lipid analyses. Equal amounts of lipid samples were loaded per TLC lane. TLCs were developed in the solvent systems [chloroform:methanol:water] (20:4:0.5, by vol.) (solvent A), [chloroform:methanol:water] (65:25:4, by vol.) (solvent B) or petroleum ether: ethyl acetate (98:2, by vol.; three developments) (solvent C) and revealed by spraying with cupric sulfate and heating. TMM, trehalose monomycolates; TDM, trehalose dimycolates; PE, phosphatidylethanolamine; CL, cardiolipin; PI, phosphatidylinositol; PIM<sub>2</sub>, phosphatidylinositol dimannosides; PIM<sub>6</sub>, phosphatidylinositol hexamannosides; SL, sulfolipids; TAG, triglycerides. **b**, Mycolic acid analyses. The mycolic acids present in extractable lipids and those esterified to arabinogalactan (i.e., the cell wall-bound mycolates). α, methoxy- and keto- refer to the three types of mycolic acids produced by *M. tuberculosis*. The same amount of samples was loaded per lane. The TLCs were developed thrice in the solvent system [*n*-hexanes:ethyl acetate] (95:5, by vol.) and revealed by spraying with cupric sulfate and heating. MAMES, mycolic acid methyl esters; FAMES, fatty acid methyl esters. See Methods for details.
